# Supplementary material for: High Burden and Phenotype-Specific Variability of Pain Polypharmacy in Early Autoimmune Rheumatic Diseases: A 15-Year Real-World Analysis
Source: Research Square preprint supplement (doi:10.21203/rs.3.rs-9152435/v1), 2026-04-01
Supplement: Supplementary file 1 [file ff2f3c45f64f08a6179565ef.docx]

**Supplementary Figure 1. Flow Chart**


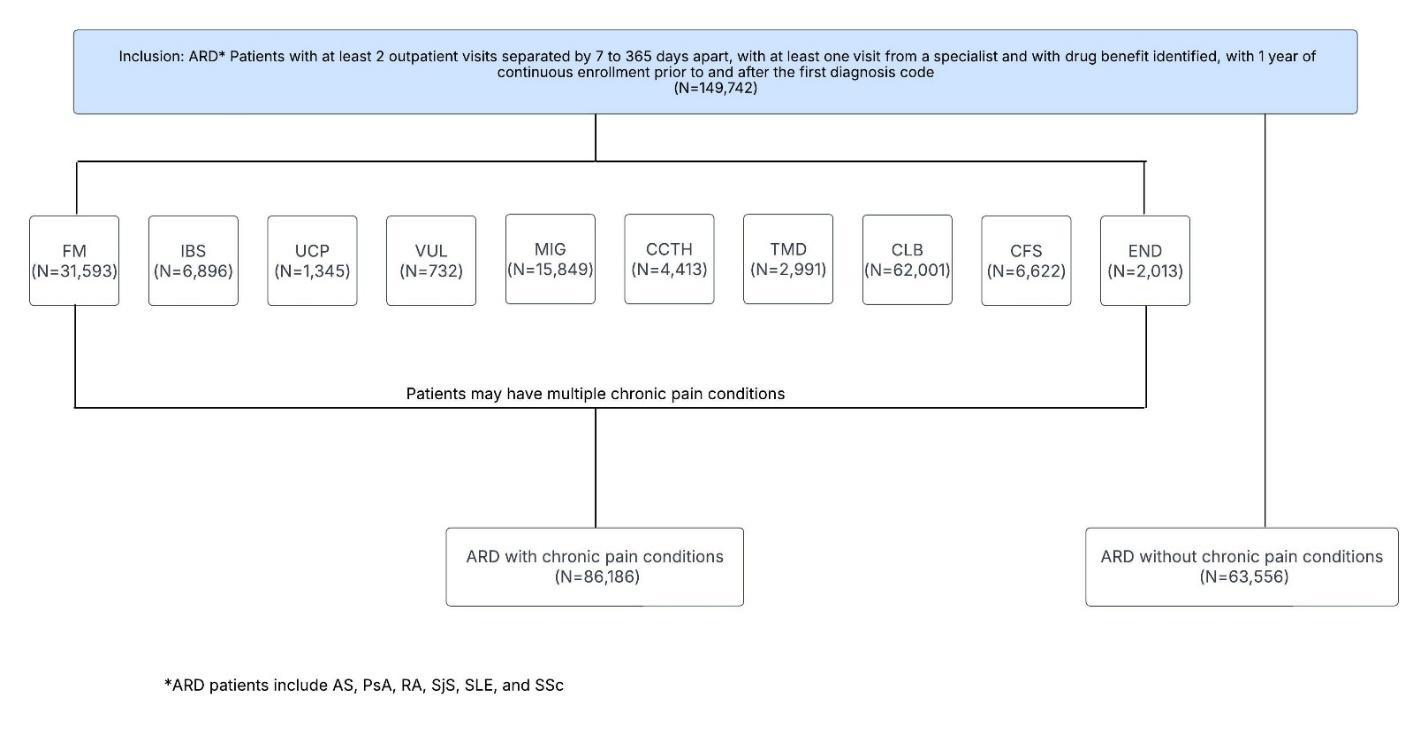


**Supplementary Table. Statistical Testing**

|  | Statistic | Period Prior to 2015  (2008–2014) | Period After 2015  (2015–2024) | Difference | Z-Score for Difference | P-value for Difference |
| --- | --- | --- | --- | --- | --- | --- |
| Prescriptions | Mean | 9.31 | 8.53 | -0.79 | -11.56 | < 0.0001 |
| Categories | Mean | 2.16 | 2.06 | -0.10 | -9.96 | < 0.0001 |
| MQS | Mean | 3.93 | 3.67 | -0.26 | -8.71 | < 0.0001 |
| ≥5 medications | Proportion | 0.49 | 0.46 | -0.03 | -12.38 | < 0.0001 |
| ≥10 prescriptions | Proportion | 0.31 | 0.29 | -0.02 | -10.22 | < 0.0001 |

**Supplementary Figure 2. Number of Prescriptions by COPC in Ankylosing Spondylitis**

**
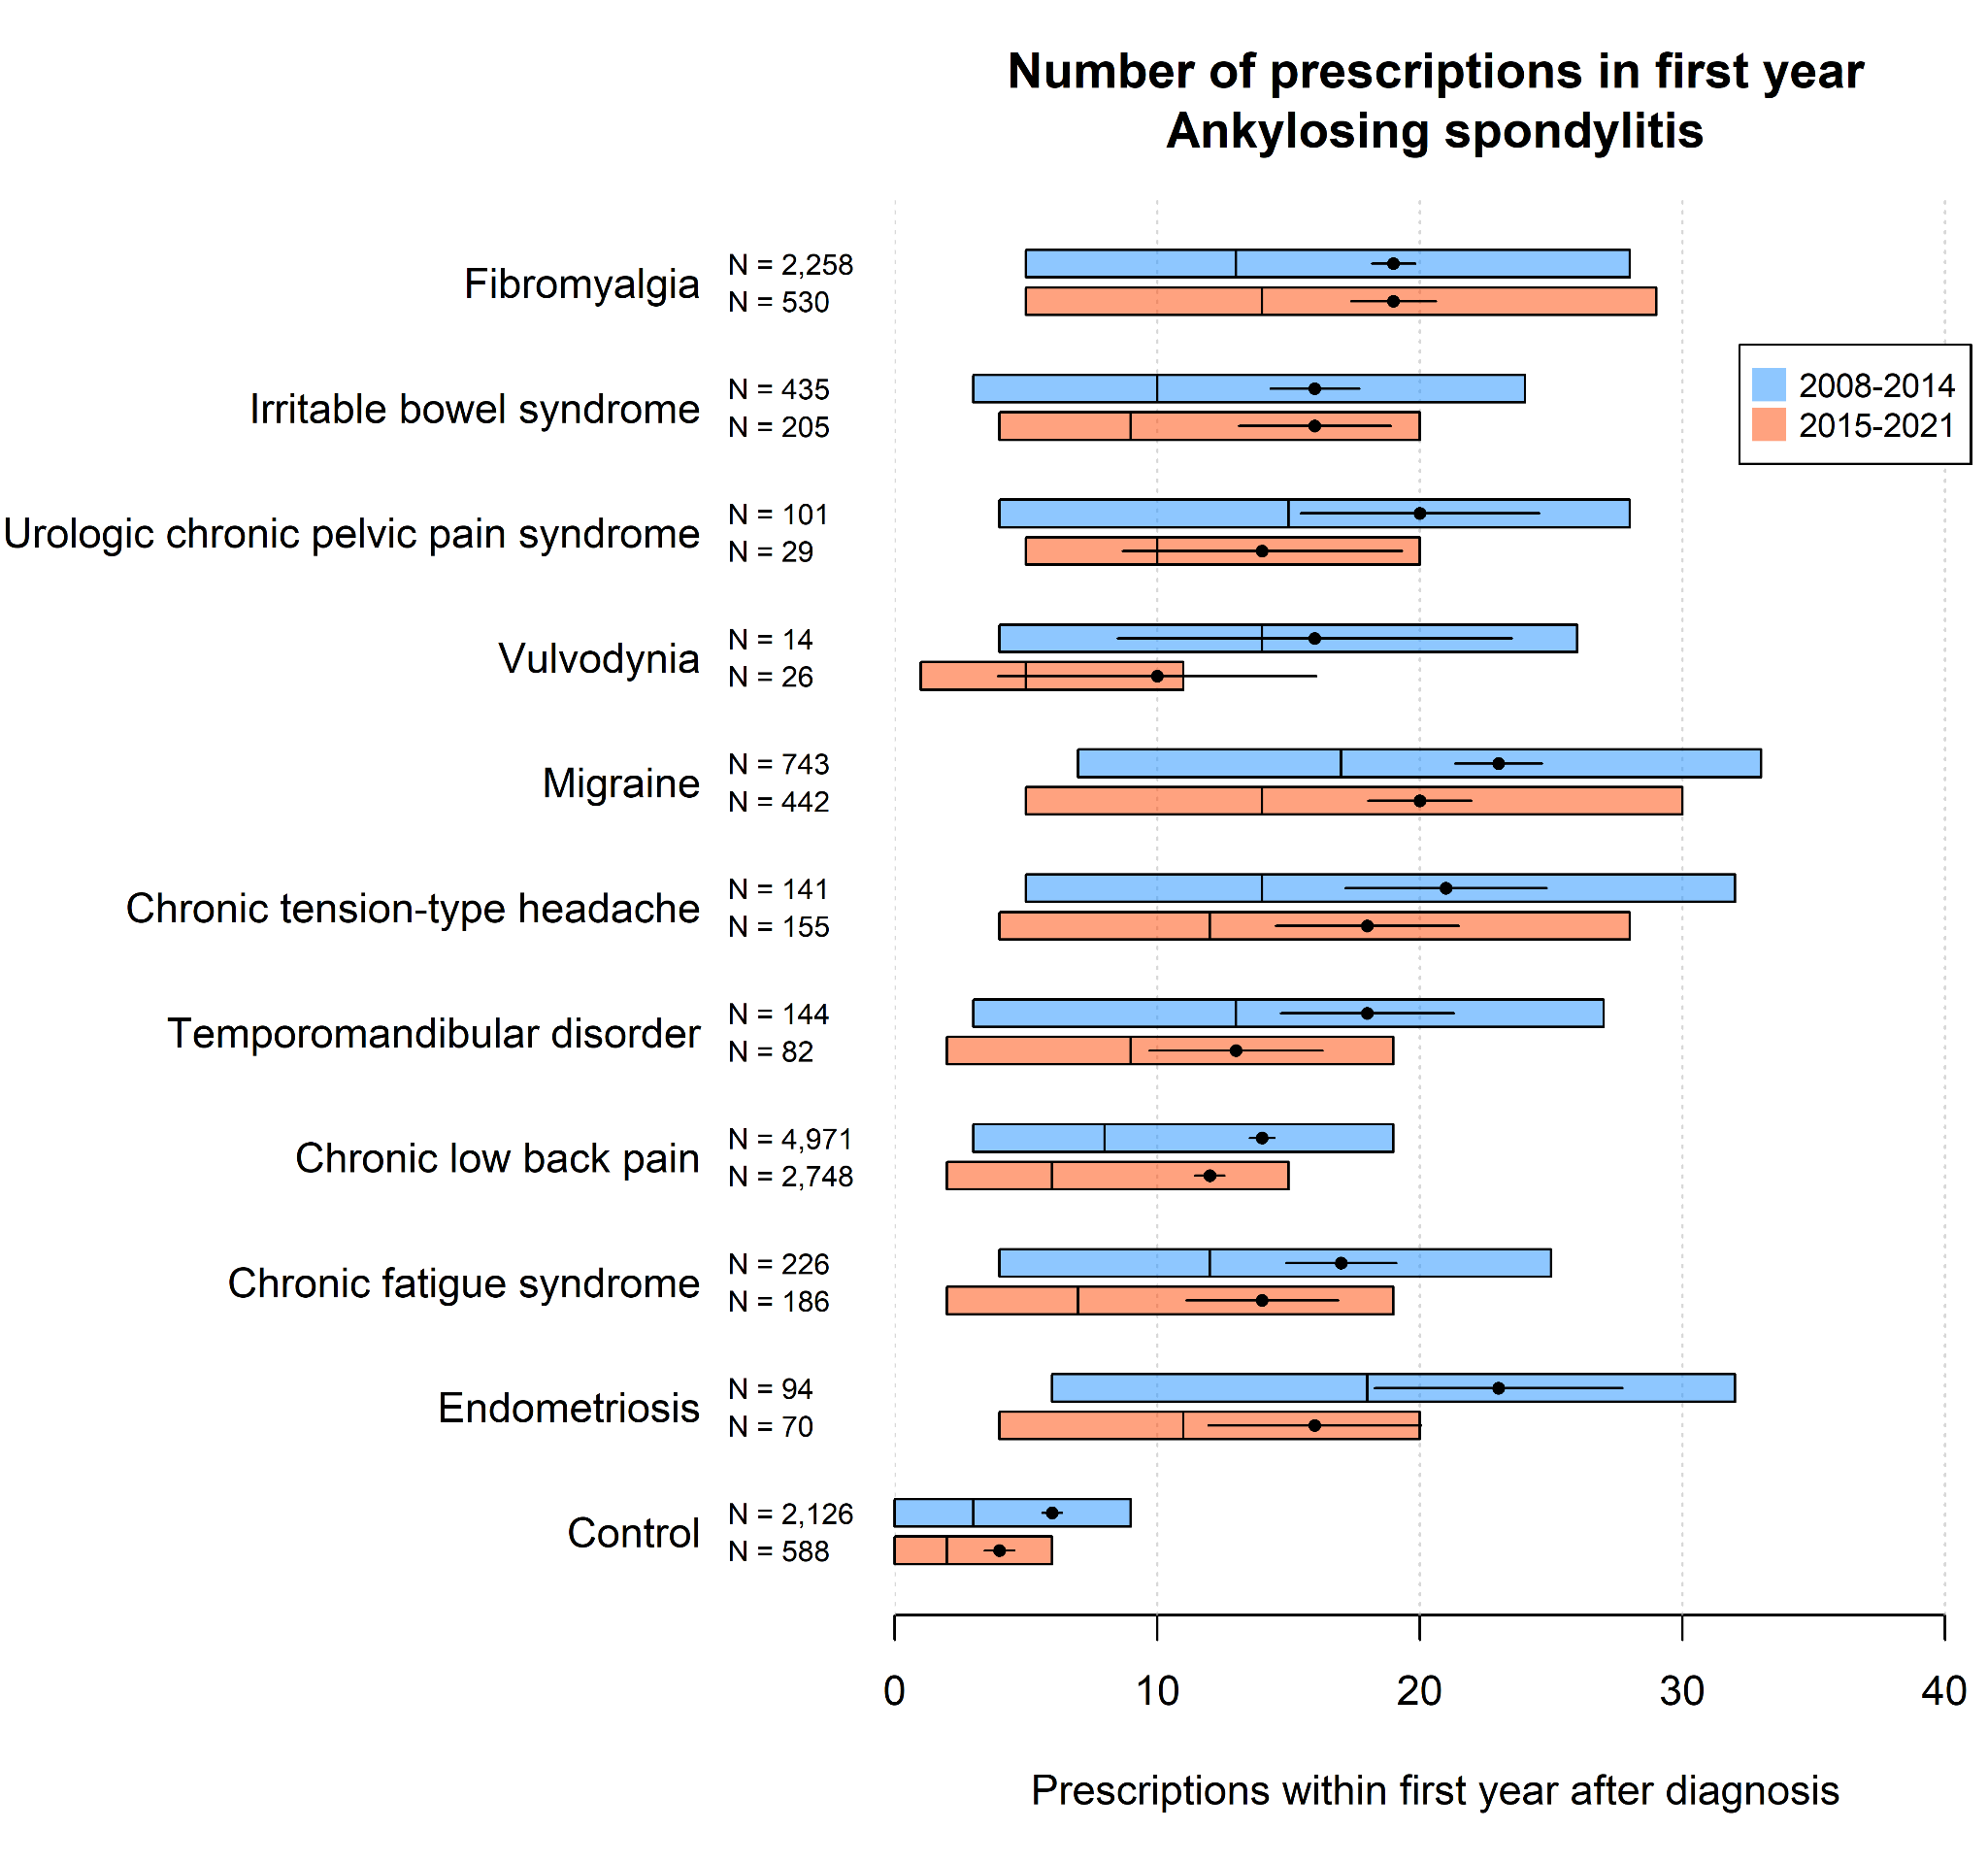
**

**Supplementary Figure 3. Number of Prescriptions by COPC in Psoriatic Arthritis
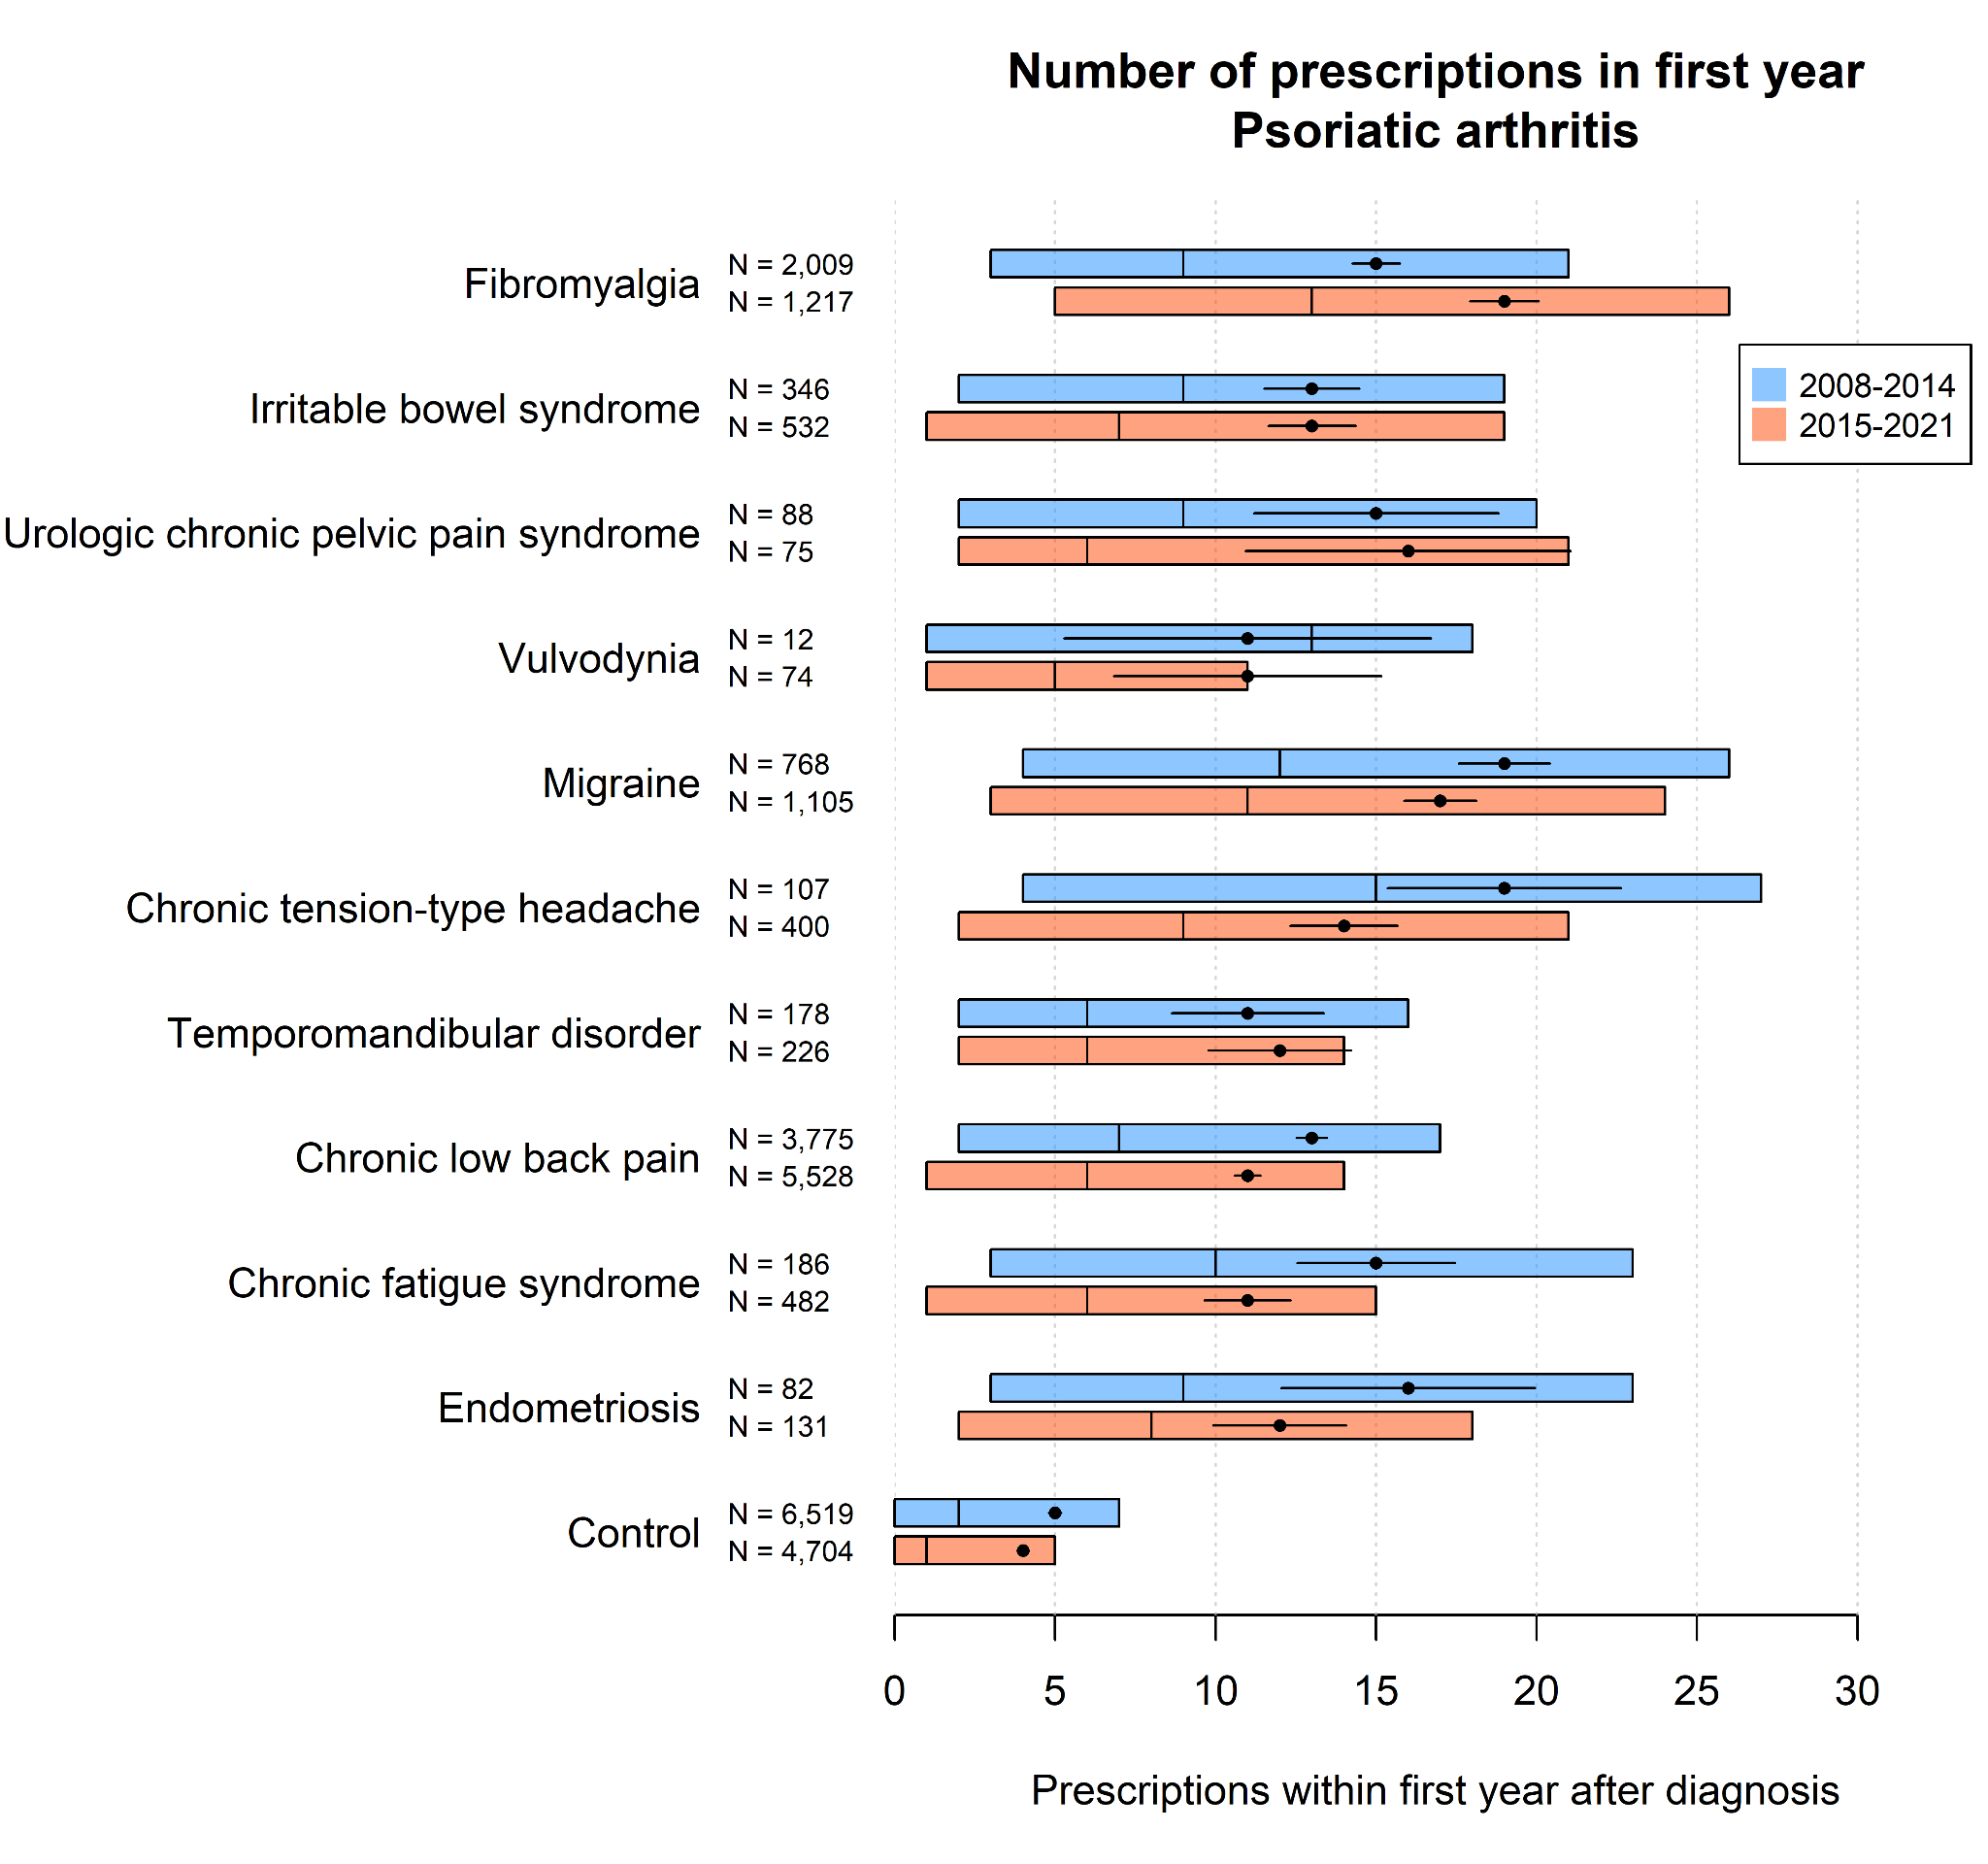
**

**Supplementary Figure 4. Number of Prescriptions by COPC in Rheumatoid Arthritis
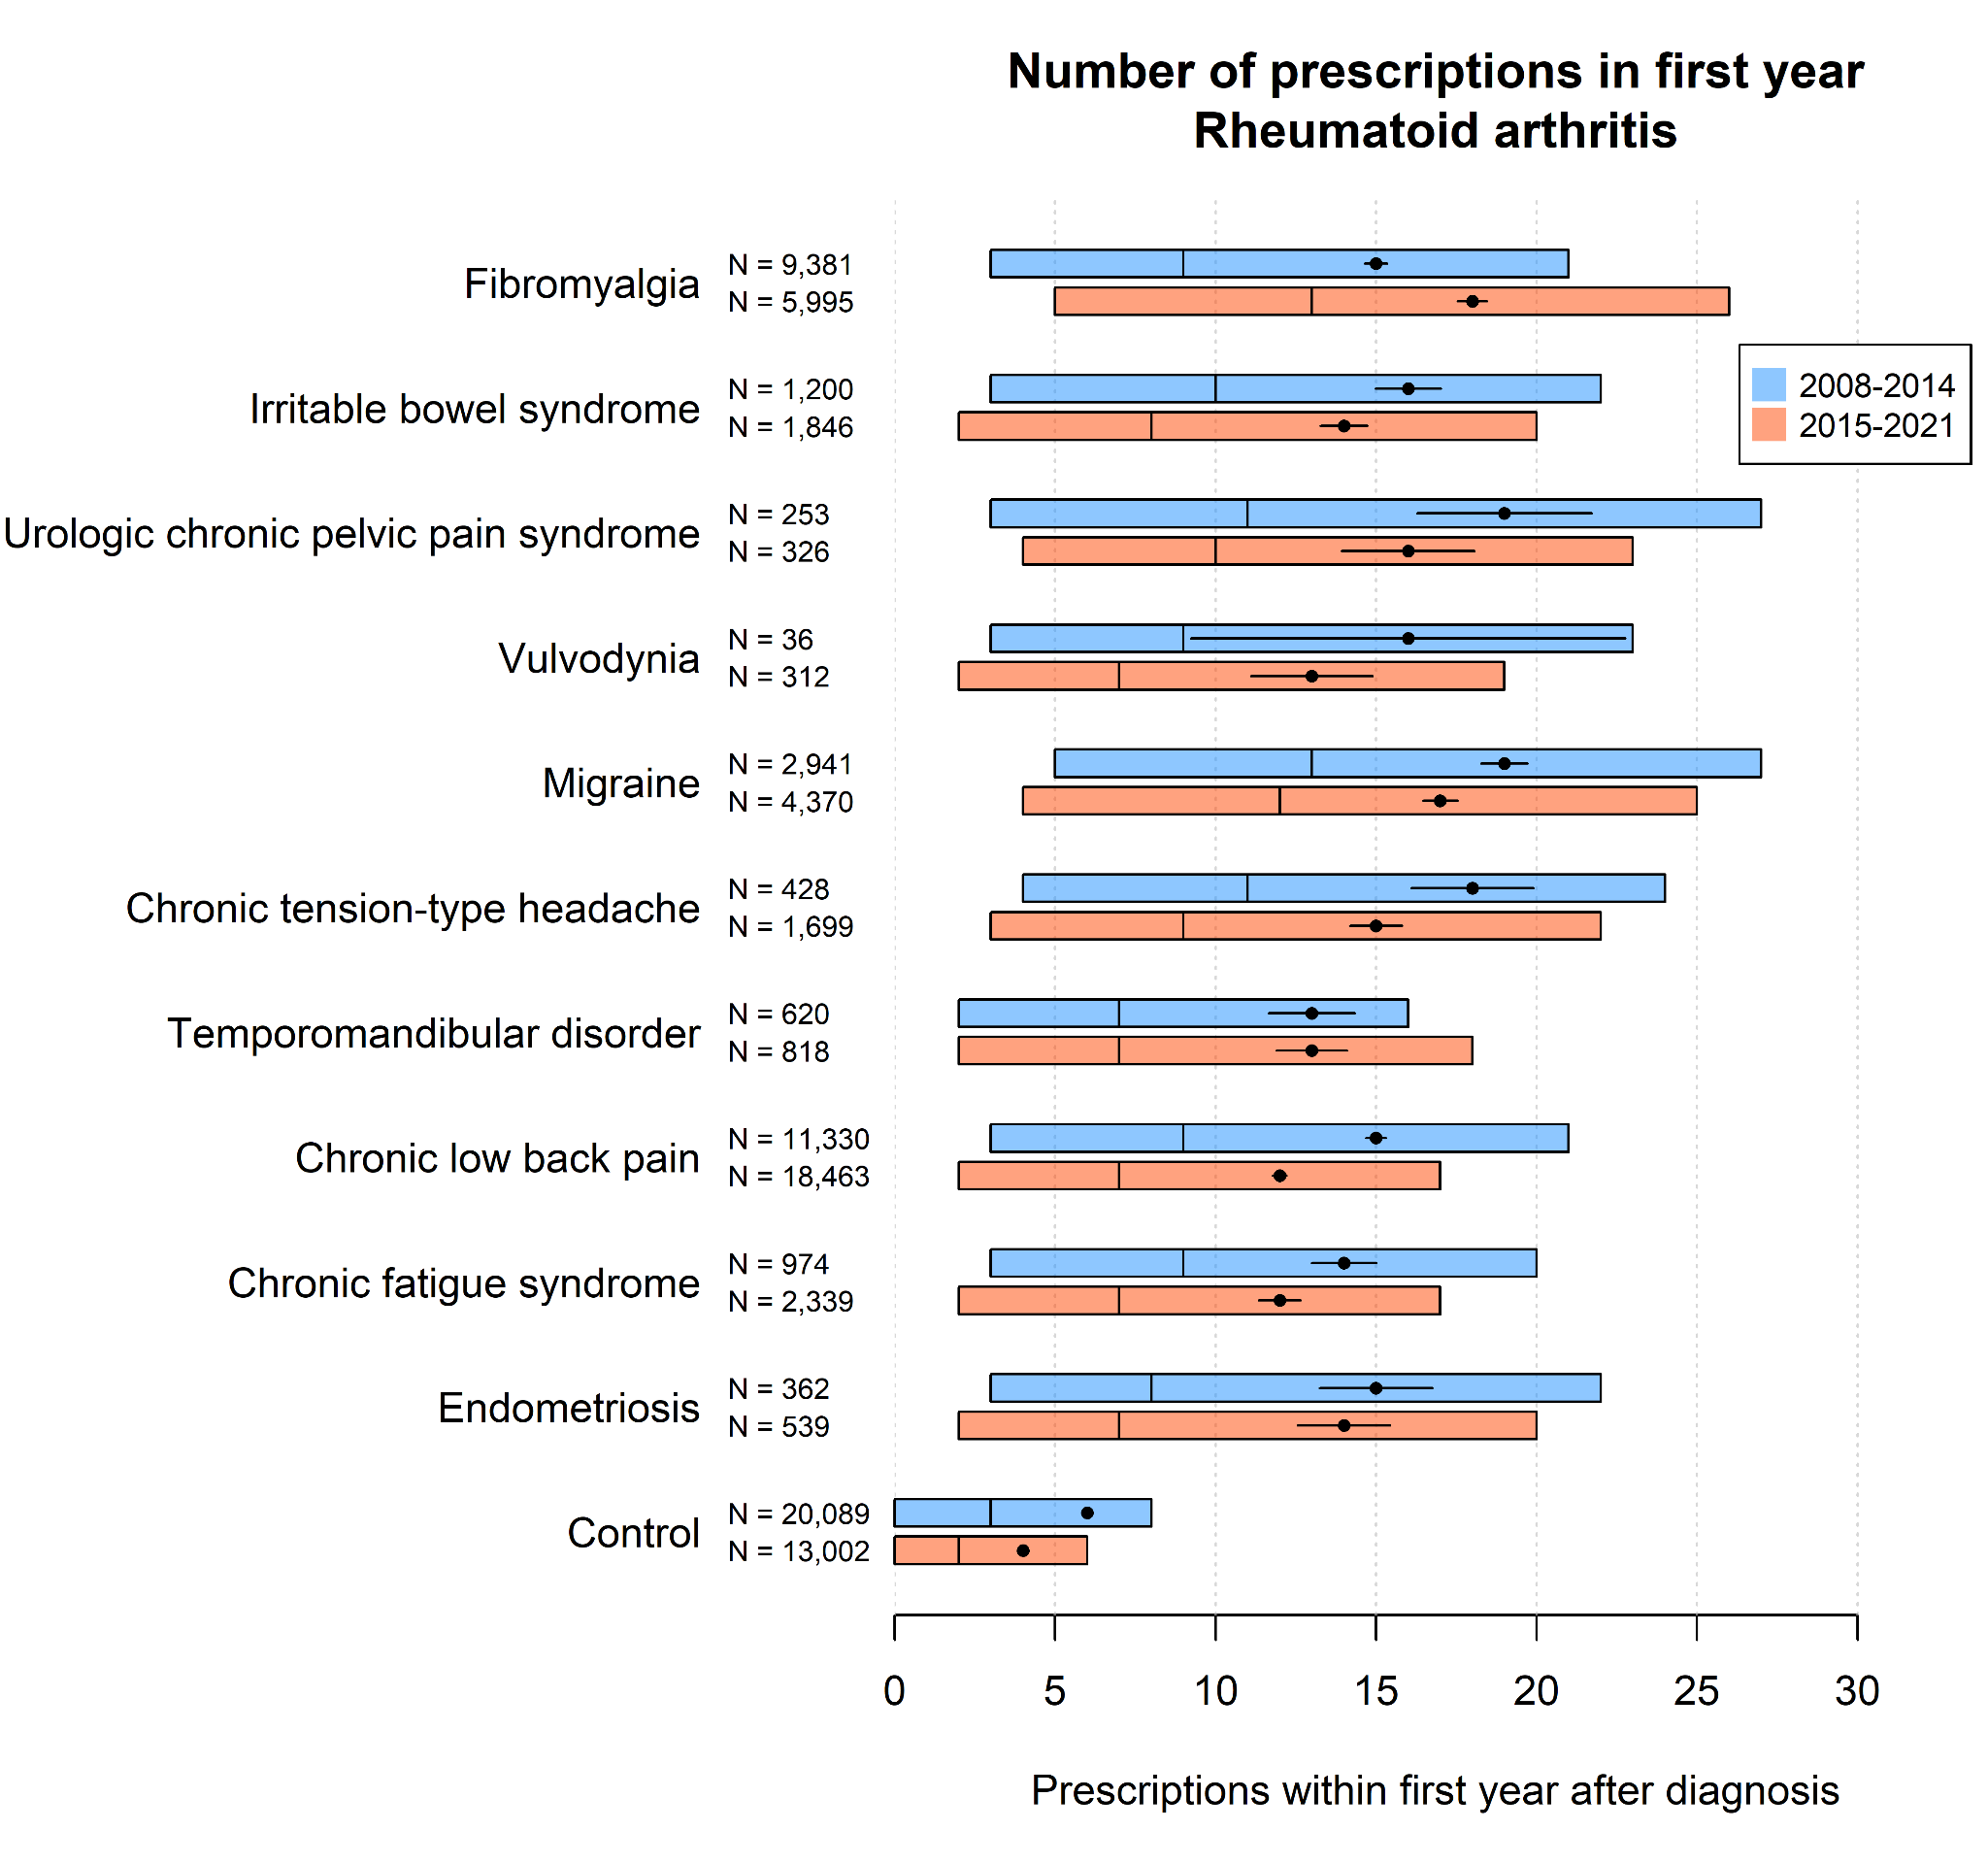
**

**Supplementary Figure 5. Number of Prescriptions by COPC in Sjogren’s disease
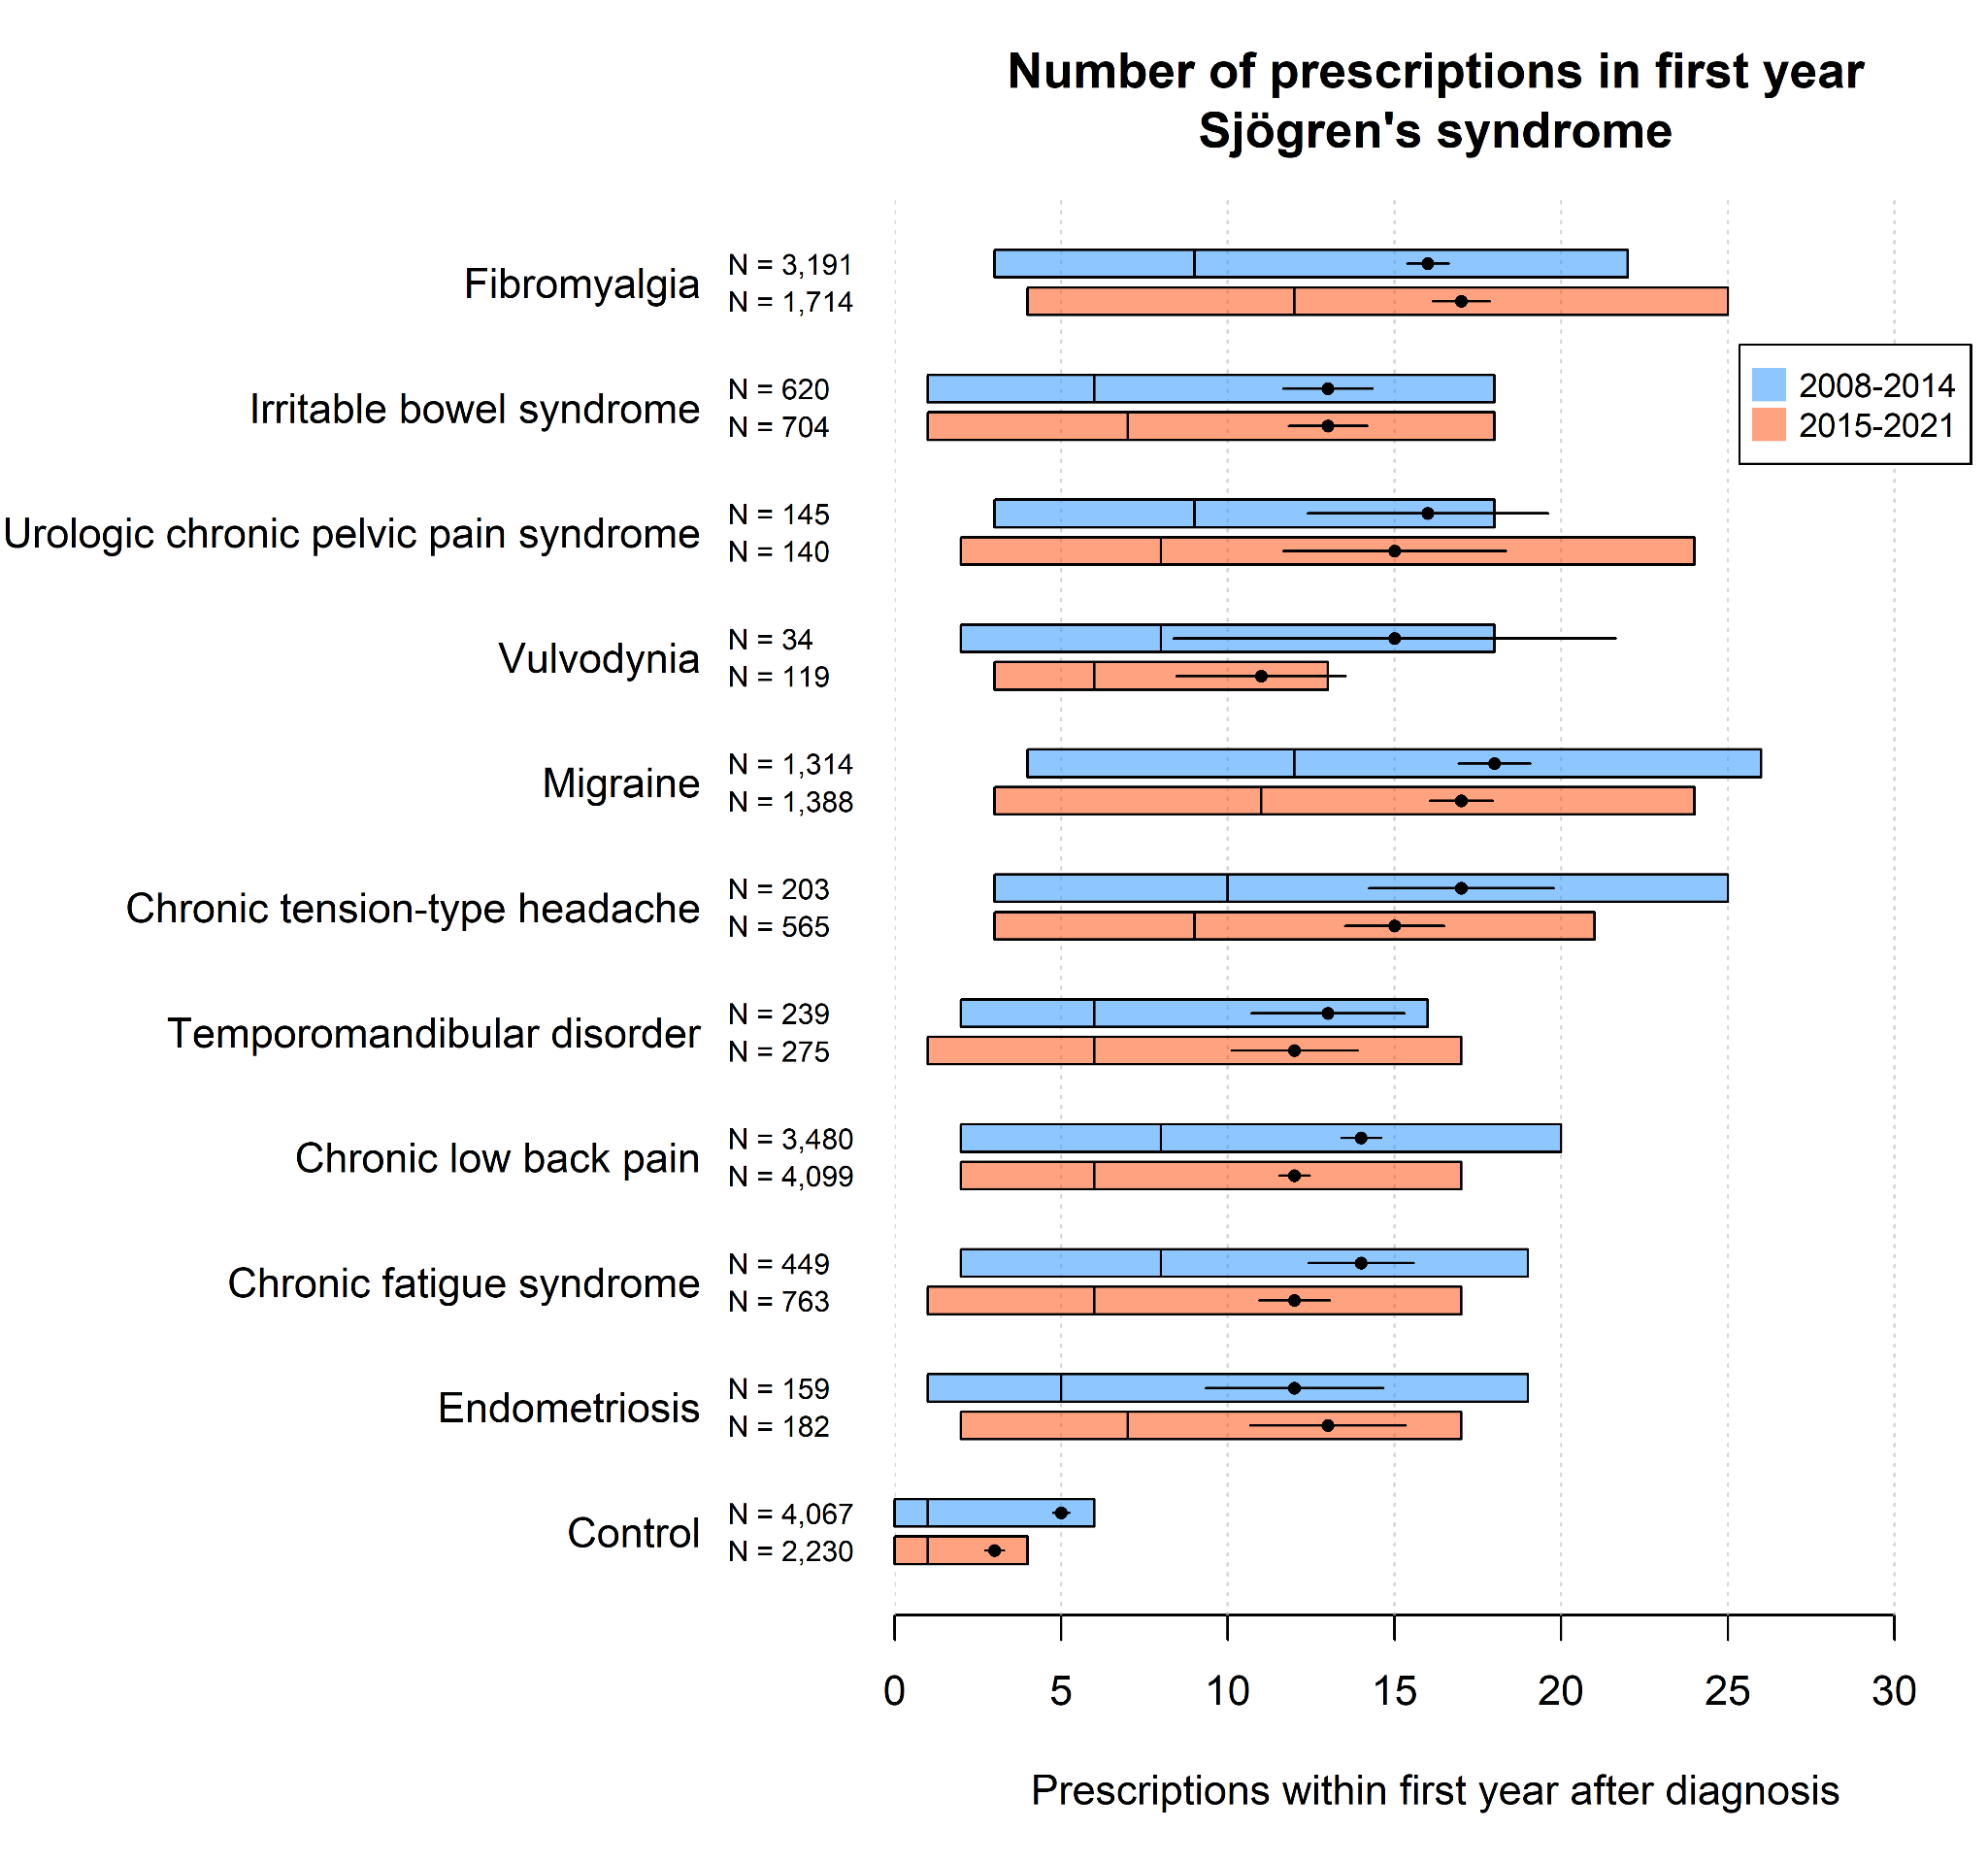
**

**Supplementary Figure 6. Number of Prescriptions by COPC in Systemic Lupus Erythematosus
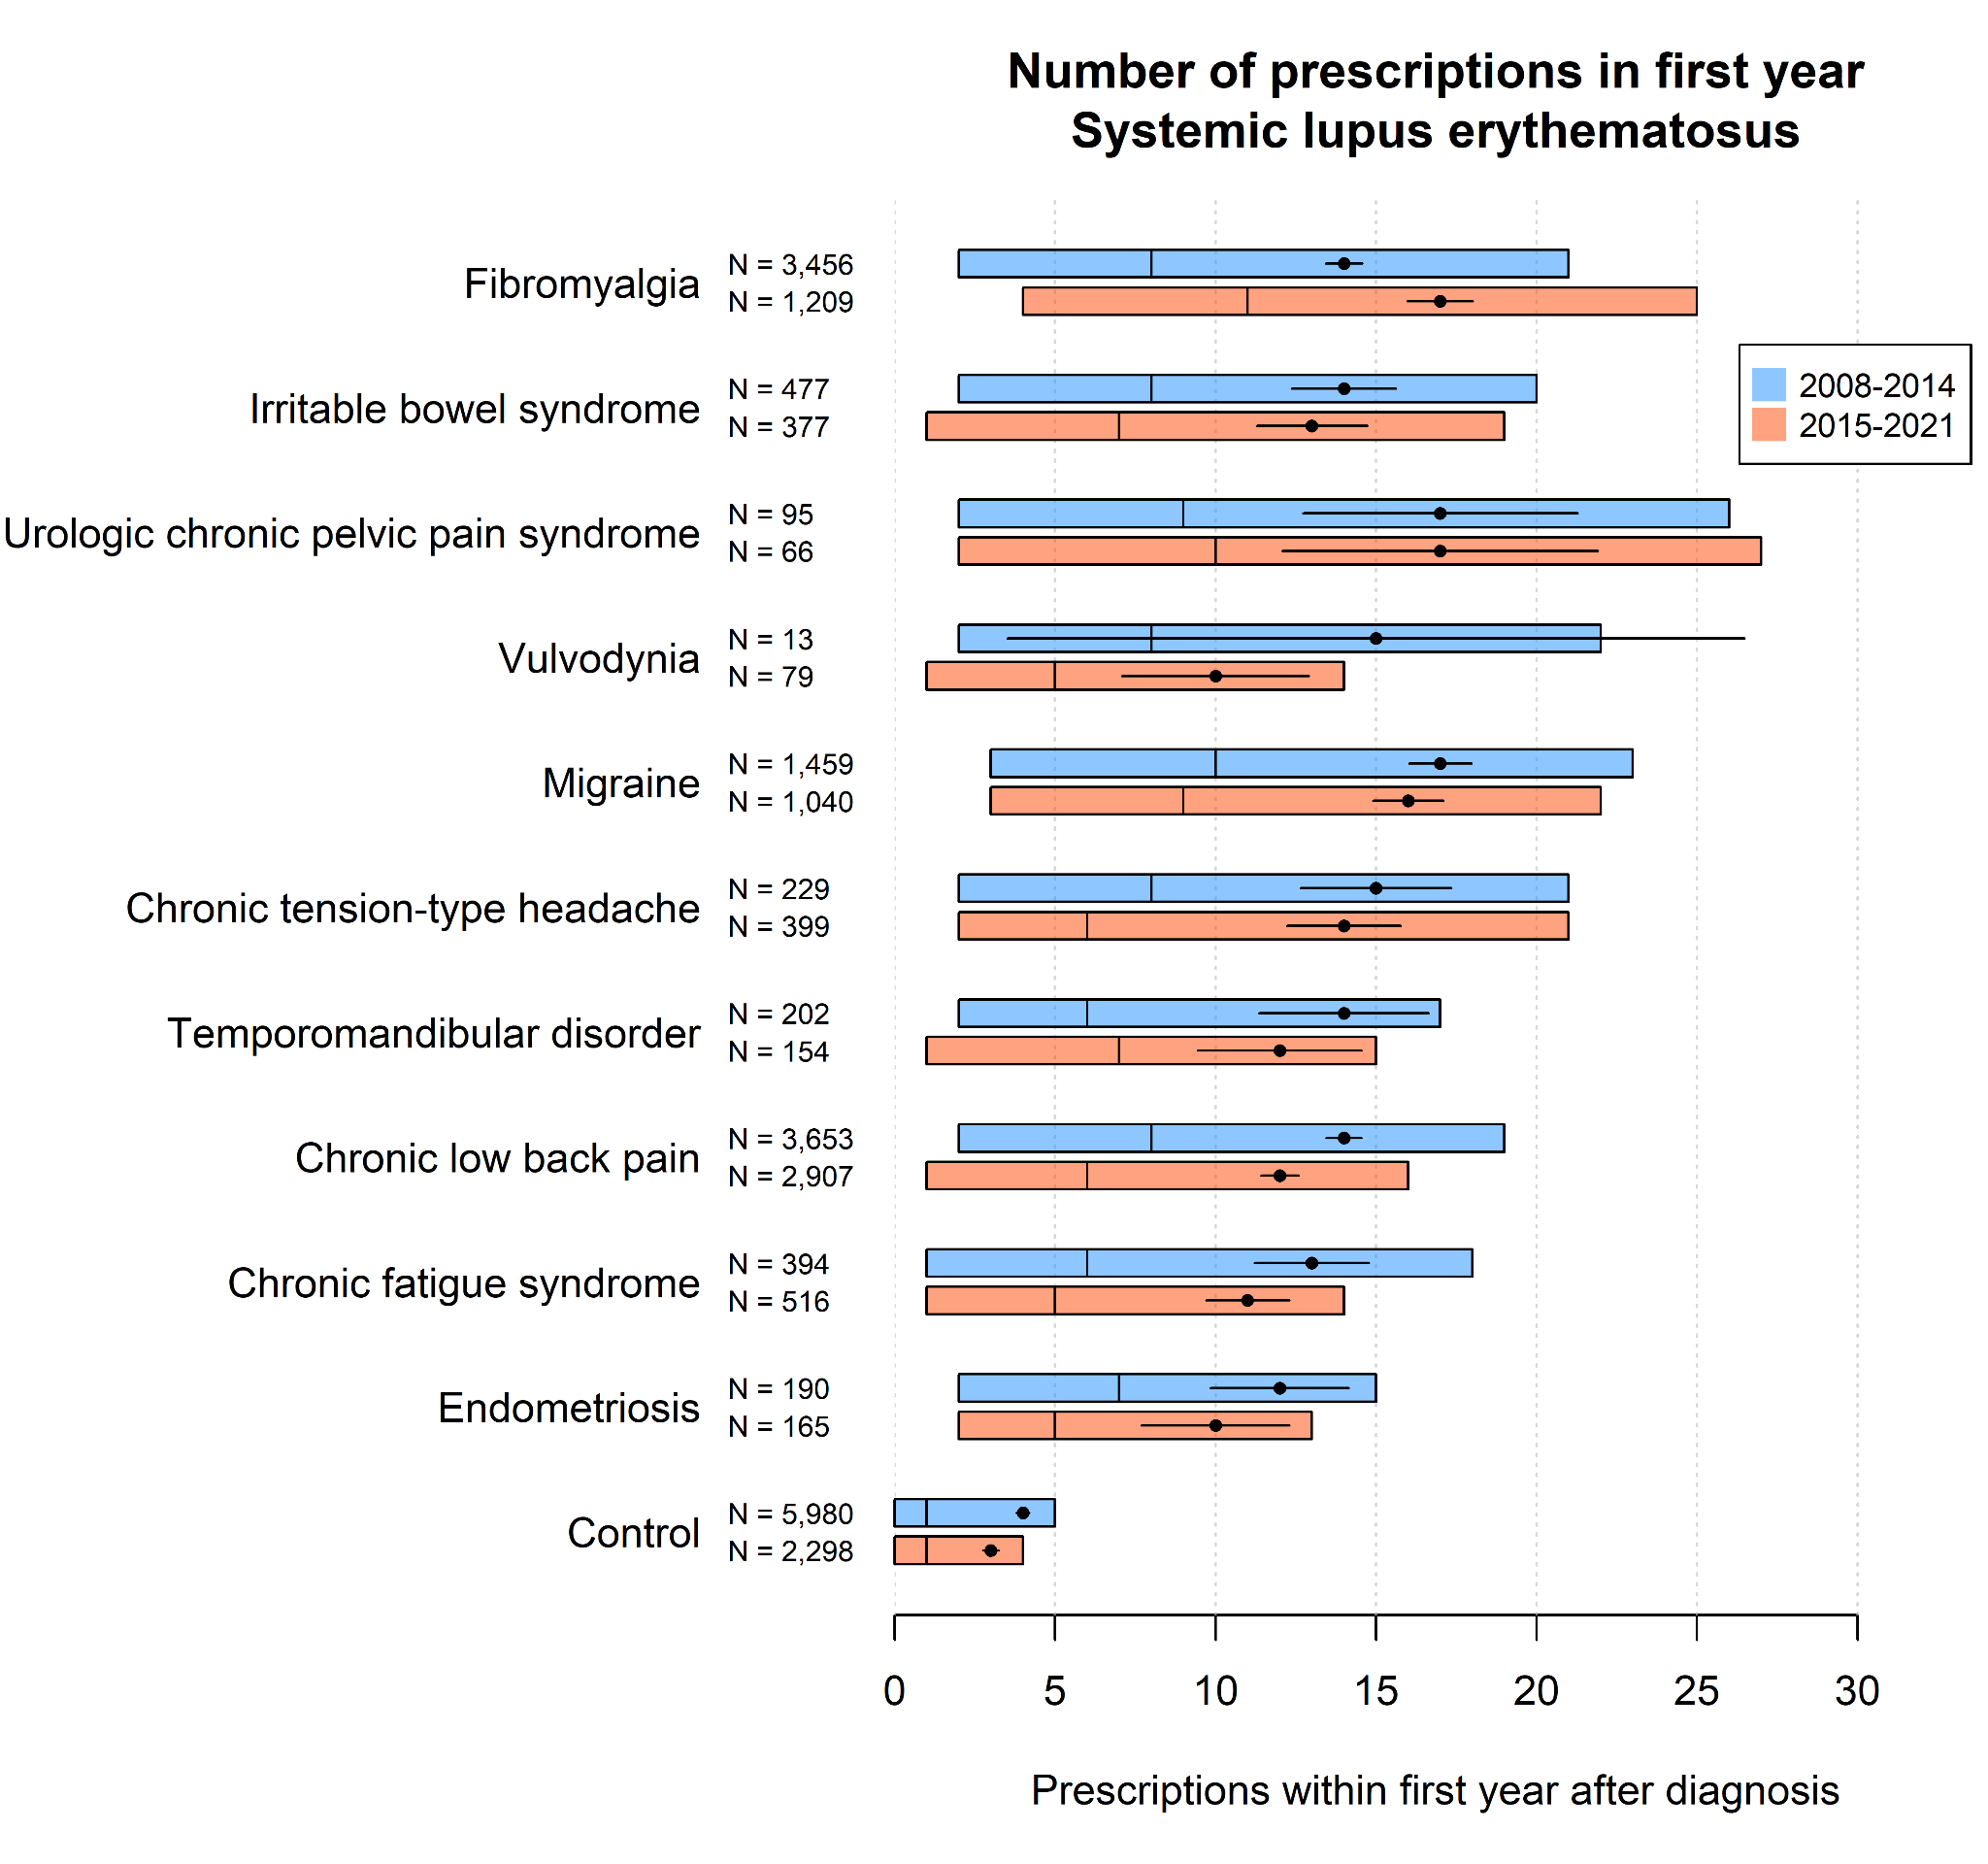
**

**Supplementary Figure 7. Number of Prescriptions by COPC in Systemic Sclerosis
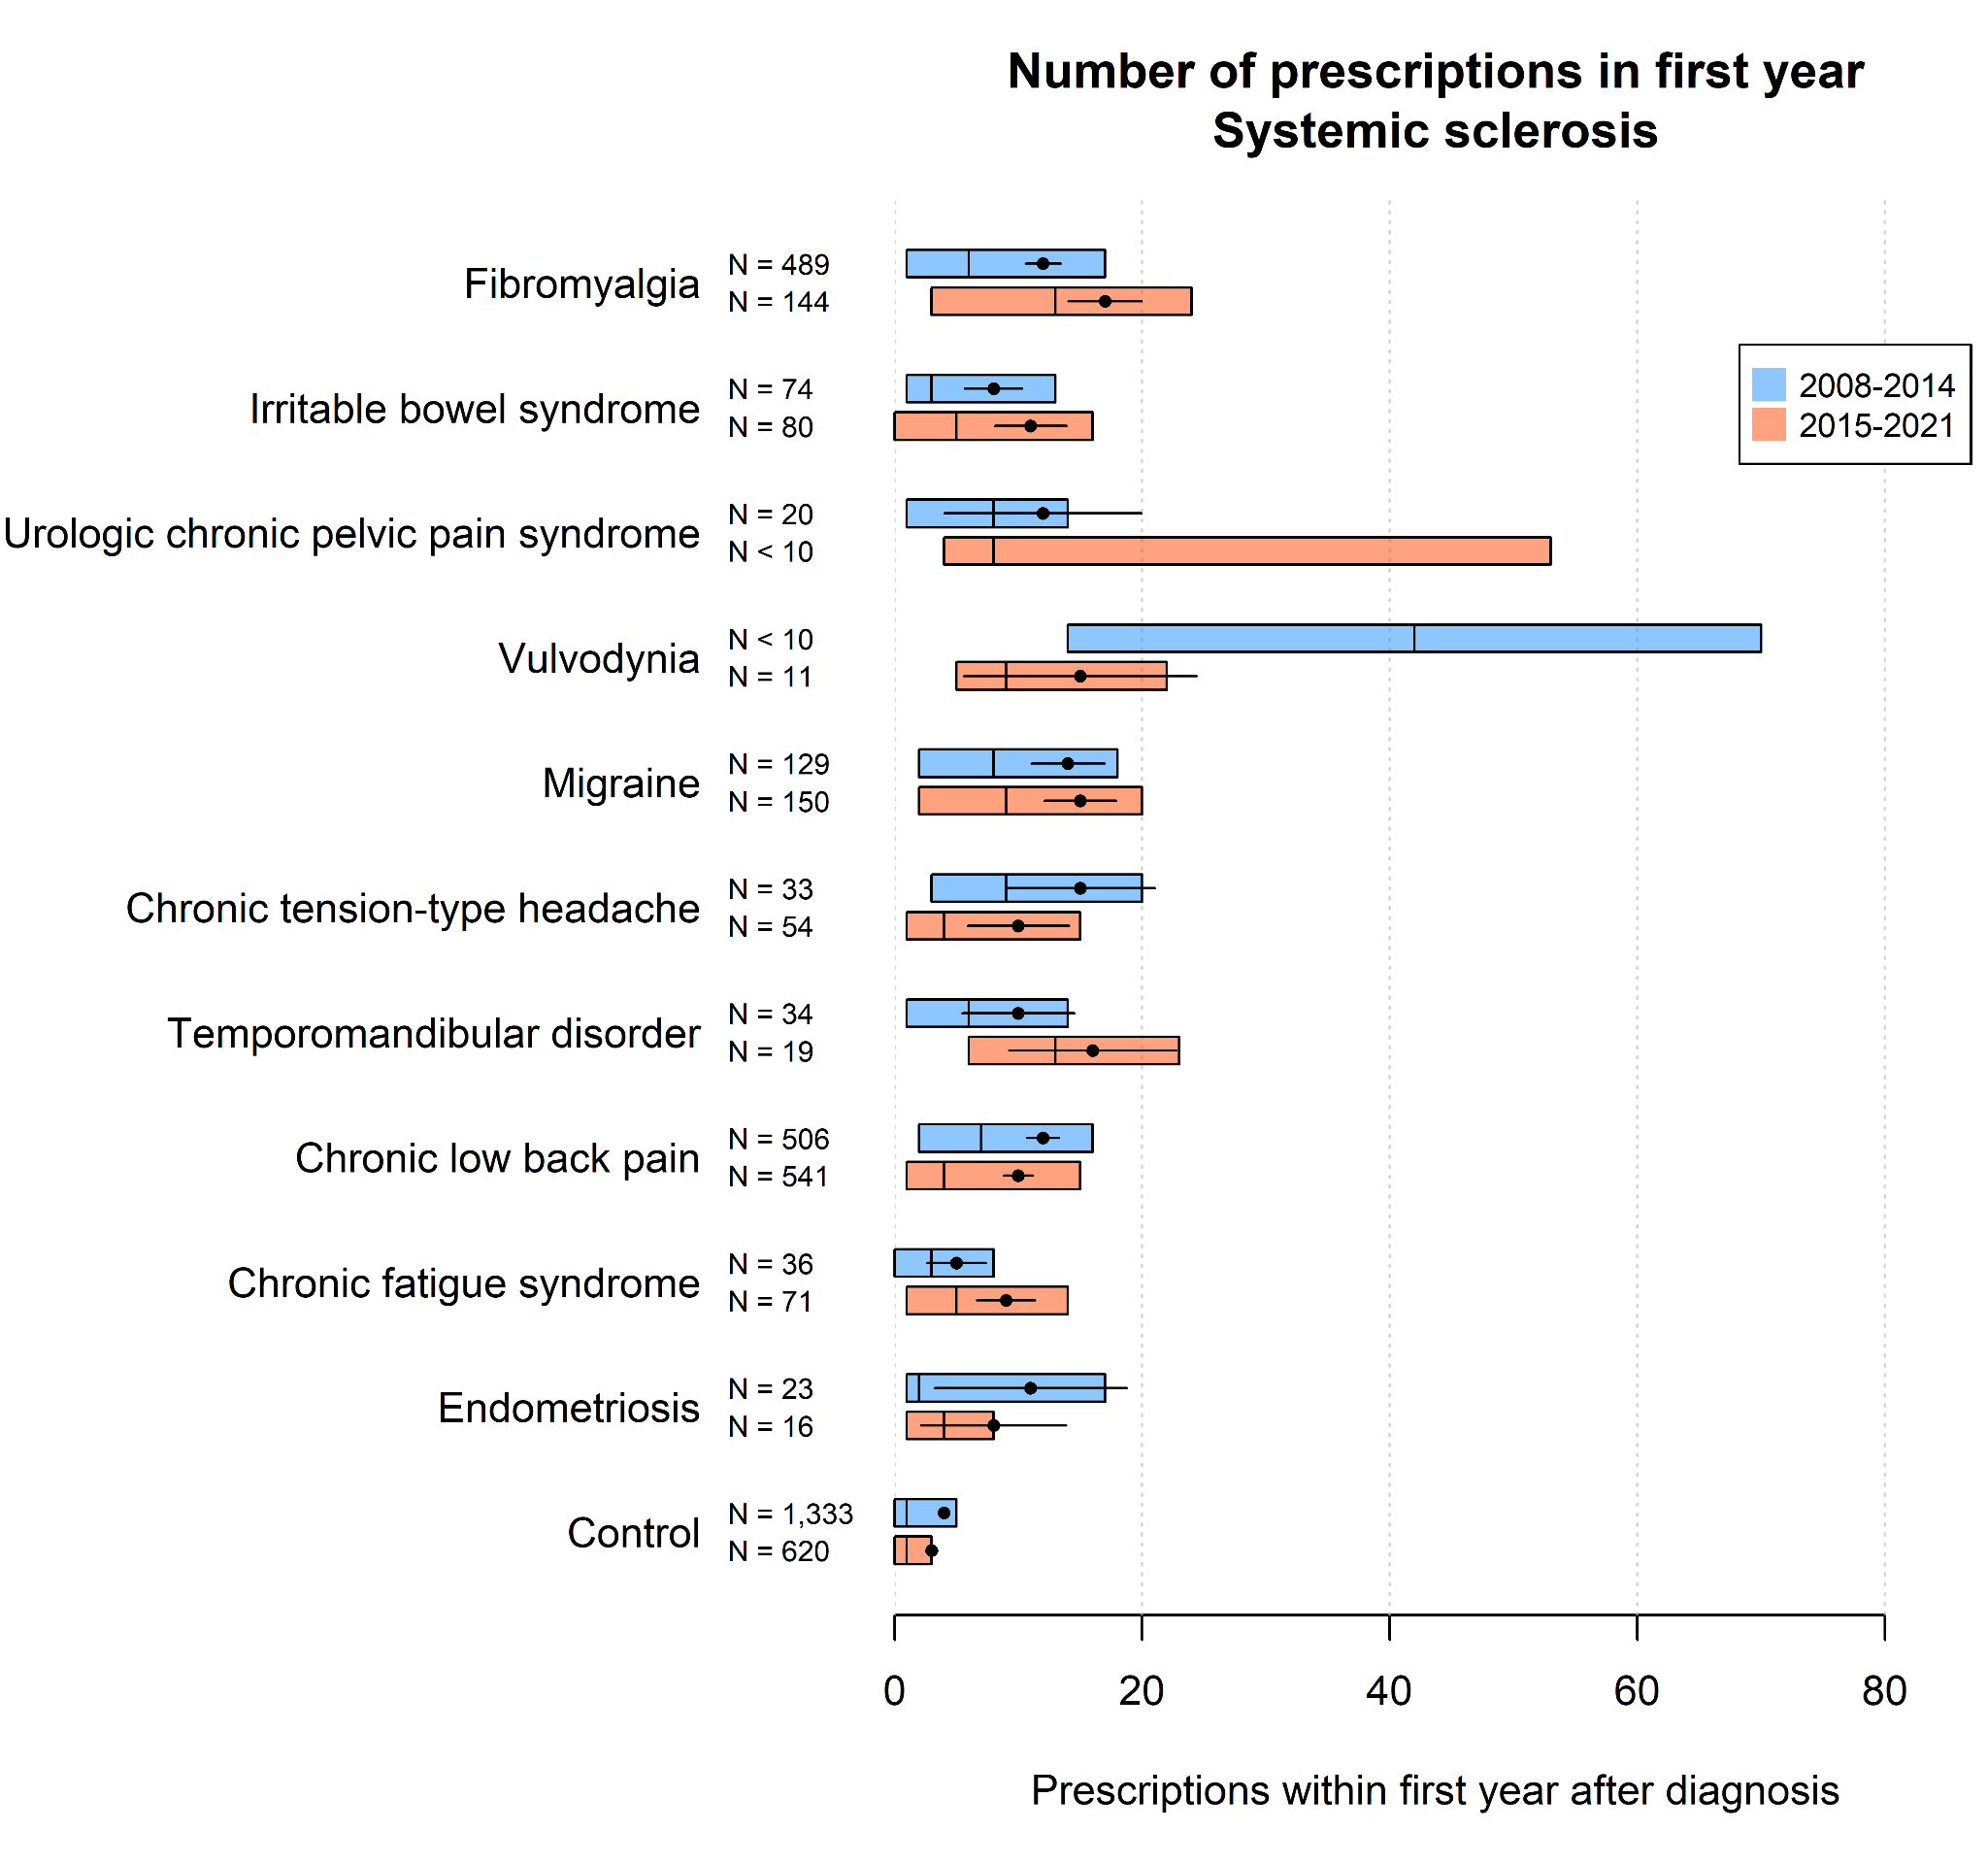
**
